# Supplementary material for: Safety of transcutaneous auricular vagus nerve stimulation (taVNS): a systematic review and meta-analysis
Source: Springer Nature journal article supplement (doi:10.1038/s41598-022-25864-1), 2022-12-21

# Safety of transcutaneous auricular vagus nerve stimulation(taVNS): A systematic review and meta-analysis

Angela Yun Kim<sup>1#</sup>, Anna Marduy<sup>2,3#</sup>, Paulo S. de Melo<sup>#3,4</sup>, Anna Carolyna Gianlorenco<sup>3,5</sup>, Chi Kyung Kim<sup>6</sup>, Hyuk Choi<sup>7,8</sup>, Jae-Jun Song<sup>1,8</sup>, and Felipe Fregni<sup>3</sup>

#equally contributed authors

## SUPPLEMENTARY MATERIAL 1

### Flowchart of the included studies

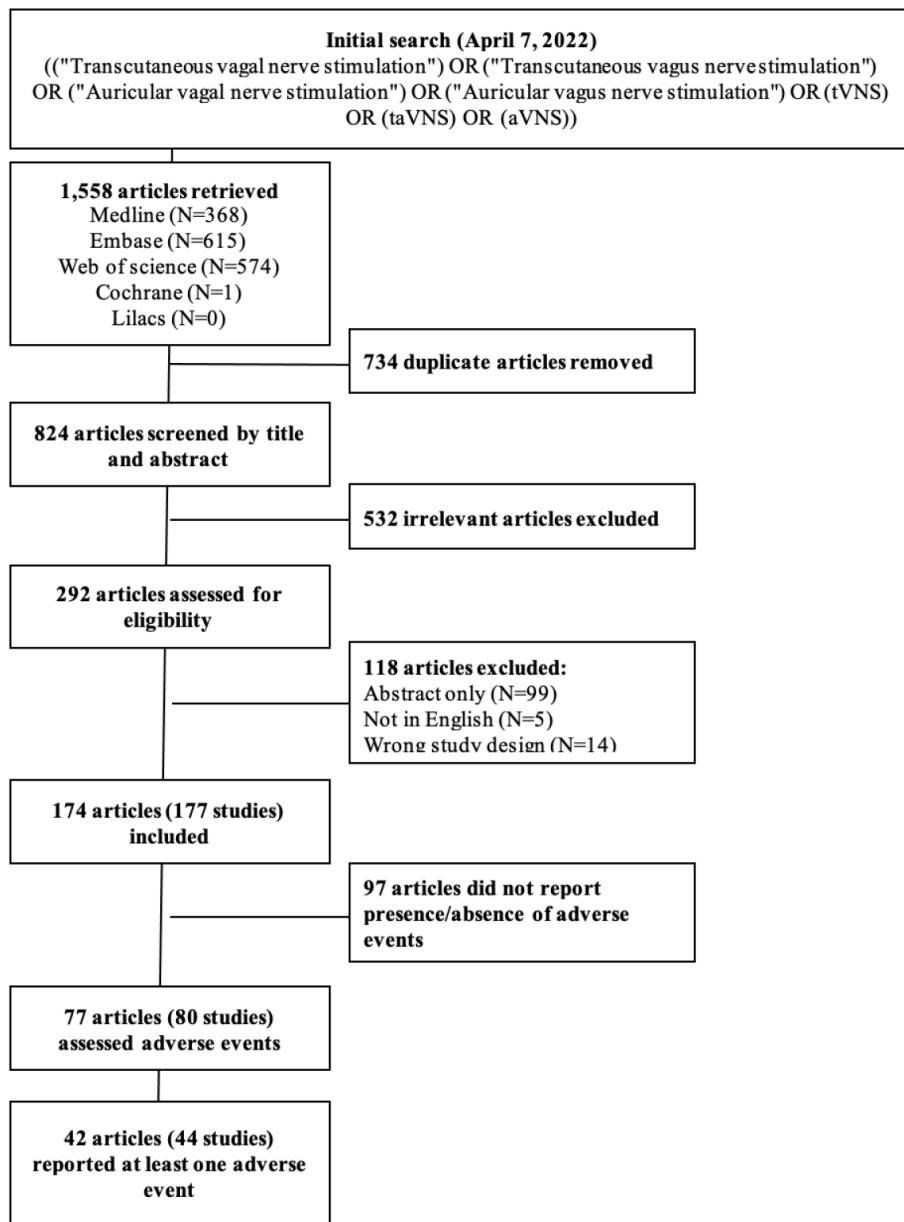

Supplement: MOESM1 [file 41598_2022_25864_MOESM1_ESM.pdf]
